# Supplementary material for: Shared component modelling as an alternative to assess geographical variations in medical practice: gender inequalities in hospital admissions for chronic diseases
Source: BMC Med Res Methodol. 2011 Dec 21;11:172. doi: 10.1186/1471-2288-11-172 (PMC3273448; doi:10.1186/1471-2288-11-172)
Supplement: Additional file 1 — Models description. Detailed description on the assumptions for each model, the estimation procedures and the outcomes that can be derived. [file 1471-2288-11-172-S1.DOC]

**Additional file 1**

Characteristics of each model: assumptions, estimation procedures and the outcomes that can be derived from each of them

|  |  | **MALES** | **FEMALES** |
| --- | --- | --- | --- |
| **CLASSICAL MODEL** | |  |  |
| **1st: Assumptions for the first level of the hierarchy** | | | |
|  |  | ~ | ~ |
| **2nd: Assumptions for the second level of the hierarchy** | | | |
|  |  | Independence between areas | |
|  |  | Independence between genders | |
| **3rd:Estimation** | | Maximum Likelihood: : IUR1i=o1i/e1i | :IUR2i=o2i/e2i |
| **4th:Outcomes** | |  | |
|  |  | **Estimates:** For , for, for rates, all with CI95%, | |
|  |  | **Maps:** Maps with the estimates | |
|  |  | **Variation:** Statistics of variation: EQ, CV, CVw, SCV, EB | |
| **BYM MODEL** | |  |  |
| **1st: Assumptions for the first level of the hierarchy** | | | |
|  |  | ~ | ~ |
| **2nd: Assumptions for the second level of the hierarchy** | | | |
|  |  | Dependence between areas | |
|  |  | Independence between genders | |
|  |  | log(1i)= u1i+v1i | log(2i)= u2i+v2i |
|  |  | u1i~CARNormal(W,1u1u2) | u2i~CARNormal(W,2u2) |
|  |  | v1i ~N(0, 1v1v2) | v2i ~N(0, v2v2) |
| **3rd:Estimation** | | MCMC procederes | |
| **4th:Outcomes** | |  | |
|  |  | **Estimates:** Smoothed P(>1| data) P(>1|data) | |
|  |  | **Maps:**,pattern & significance maps | |
|  |  | **Variation:** % variability attributable to the spatial dependence | |
|  |  | **Evaluation:**Convergence and DIC | |
| **SCM MODEL** | |  |  |
| **1st: Assumptions for the first level of the hierarchy** | | | |
|  |  | ~ | ~ |
| **2nd: Assumptions for the second level of the hierarchy** | | | |
|  |  | Dependence between areas | |
|  |  | Dependence between genders | |
|  |  |  |  |
|  |  |  |  |
|  |  | ~CARNormal | ~CARNormal |
|  |  | ~****N(0,  | ~****N(0,  |
| **3rd:Estimation** | | MCMC procederes | |
| **4th:Outcomes** | |  | |
|  |  | **Estimates:** Smoothed ,,P(>1), P(>1) | |
|  |  | **Maps:**,pattern & significance maps, common & discrepant maps | |
|  |  | **Variation:** % variability attributable to each component: | |
|  |  | **Evaluation:** Convergence and DIC | |

* Notation used in previous table

|  | **Specification** | **Explanation** |
| --- | --- | --- |
| **Common notation** | | |
|  | , | Number of admissions in area i in males and in females |
|  | , | Number of expected admissions in area i in males and in females, assuming common rates along the whole region |
|  | , | Risk of admissions in males and females in area i, unknown, needs to be estimated |
| **Classic model** | |  |
|  | IUR1i, IUR2i | Indirect Utilization ratios, which are the estimates for, via Maximum-Likelihood IUR1i=o1i/e1i |
|  | EQ, CV, CVw, SCV, EB | Statistics of Variation EQ: Extremal Quotient; CV: Coefficient of Variation; CVw: Weighted Coefficient of Variation; SCV: Systematic Component of Variation; EB: Empirical Bayes statistic. Higher values indicate higher variability. |
| **BYM model** | |  |
|  | u1i, u2i | Random effects which model the spatial correlation in the risk of admission for males (u1i) and females (u2i). To do so, a conditional autorregresive distribution is assigned for each one, CARNormal(W,1u1u2). If data are not correlated, the variance component estimate, 1u, will be low |
|  | v1i,, v2i | Random effects which have independent structure, N(0, 1v1v2). They need to be included together with the ui random vector, otherwise we would be forcing spatial structure where it may not be present. |
|  | % variance spatially structured | =sum2/ (sum2 + v2), where sum2 is the marginal spatial variance, sum2=∑i(ui -ū)2/(n-1), |
|  | P(>1| data)  P(>1| data) | The posterior probability for area i to have an admission risk higher than that for the whole region, given the data. These values are often used to derive probability maps, for which cut-off points 0.2 and 0.8 are used. |
|  | DIC | Deviance Information Criteria: it is used in the Bayesian framework to compare models. DIC=D+ pD, where D is the Deviance average and pD the number of effective parameters. Models with smaller DIC are preferred. |
| **SCM model** | |  |
|  |  | In the log-scale, the relative risk of admission in area i for males and females compared to that of the whole region |
|  |  | The random effect assigned to area i, which represents the shared risk in males and females. We assumed it as spatially correlated. |
|  |  | A parameter that allows for a different gradient on the shared component for males and females. |
|  |  | The random effects assigned to area i, which depict differences between males and females with respect to the common pattern.is referred to males and and are referred to females, with spatial structure and and with an independent structure. |
|  | Partition of variance | The whole variability observed in males can be decomposed by that attributed to the common pattern and that specific to males. The same applies to females. |
|  | P(>1| data), DIC | Idem explanation as for BYM model |
